# Supplementary material for: Inhibition of the DNA damage response phosphatase PPM1D reprograms neutrophils to enhance anti-tumor immune responses
Source: PubMed Central journal article supplement (PMC8206133; doi:10.1038/s41467-021-23330-6), 2021-06-15
Supplement: 41467_2021_23330_MOESM2_ESM.pdf [file 41467_2021_23330_MOESM2_ESM.pdf]

## Reporting Summary

Nature Research wishes to improve the reproducibility of the work that we publish. This form provides structure for consistency and transparency in reporting. For further information on Nature Research policies, see our [Editorial Policies](#) and the [Editorial Policy Checklist](#).

### Statistics

For all statistical analyses, confirm that the following items are present in the figure legend, table legend, main text, or Methods section.

n/a Confirmed

- |                                     |                                     |                                                                                                                                                                                                                                                            |
|-------------------------------------|-------------------------------------|------------------------------------------------------------------------------------------------------------------------------------------------------------------------------------------------------------------------------------------------------------|
| <input type="checkbox"/>            | <input checked="" type="checkbox"/> | The exact sample size ( $n$ ) for each experimental group/condition, given as a discrete number and unit of measurement                                                                                                                                    |
| <input type="checkbox"/>            | <input checked="" type="checkbox"/> | A statement on whether measurements were taken from distinct samples or whether the same sample was measured repeatedly                                                                                                                                    |
| <input type="checkbox"/>            | <input checked="" type="checkbox"/> | The statistical test(s) used AND whether they are one- or two-sided<br><i>Only common tests should be described solely by name; describe more complex techniques in the Methods section.</i>                                                               |
| <input checked="" type="checkbox"/> | <input type="checkbox"/>            | A description of all covariates tested                                                                                                                                                                                                                     |
| <input type="checkbox"/>            | <input checked="" type="checkbox"/> | A description of any assumptions or corrections, such as tests of normality and adjustment for multiple comparisons                                                                                                                                        |
| <input type="checkbox"/>            | <input checked="" type="checkbox"/> | A full description of the statistical parameters including central tendency (e.g. means) or other basic estimates (e.g. regression coefficient) AND variation (e.g. standard deviation) or associated estimates of uncertainty (e.g. confidence intervals) |
| <input type="checkbox"/>            | <input checked="" type="checkbox"/> | For null hypothesis testing, the test statistic (e.g. $F$ , $t$ , $r$ ) with confidence intervals, effect sizes, degrees of freedom and $P$ value noted<br><i>Give <math>P</math> values as exact values whenever suitable.</i>                            |
| <input checked="" type="checkbox"/> | <input type="checkbox"/>            | For Bayesian analysis, information on the choice of priors and Markov chain Monte Carlo settings                                                                                                                                                           |
| <input checked="" type="checkbox"/> | <input type="checkbox"/>            | For hierarchical and complex designs, identification of the appropriate level for tests and full reporting of outcomes                                                                                                                                     |
| <input checked="" type="checkbox"/> | <input type="checkbox"/>            | Estimates of effect sizes (e.g. Cohen's $d$ , Pearson's $r$ ), indicating how they were calculated                                                                                                                                                         |

*Our web collection on [statistics for biologists](#) contains articles on many of the points above.*

### Software and code

Policy information about [availability of computer code](#)

Data collection Flow cytometry data were collected using FACSDiva (BD Biosciences, version 8.0.1). qPCR data were collected using ViiA™ 7 Software (Applied Biosystems, version 1.2). Luminescence data were collected using PerkinElmer Envision Manager (v1.13.3009.1401).

Data analysis Flow cytometry data were analyzed on FlowJo software (Tree Star, v10.0.2). Statistical analysis was performed using Prism (GraphPad software, version 8.3).

For manuscripts utilizing custom algorithms or software that are central to the research but not yet described in published literature, software must be made available to editors and reviewers. We strongly encourage code deposition in a community repository (e.g. GitHub). See the Nature Research [guidelines for submitting code & software](#) for further information.

### Data

Policy information about [availability of data](#)

All manuscripts must include a [data availability statement](#). This statement should provide the following information, where applicable:

- Accession codes, unique identifiers, or web links for publicly available datasets
- A list of figures that have associated raw data
- A description of any restrictions on data availability

This study did not generate datasets or code. The p53 ChIP-seq data and linked expression data were obtained from the human p53 Binding And Expression Resource (BAER) data hub [<https://orio.niehs.nih.gov/ucscview/nguyen/p53BAER/p53BAER.html>] for the human genome assembly hg19 and are available through the UCSC Genome Browser [<https://genome.ucsc.edu>]. Source data are available within the Article, Supplementary Information or available from the authors upon reasonable request.

## Field-specific reporting

Please select the one below that is the best fit for your research. If you are not sure, read the appropriate sections before making your selection.

Life sciences  Behavioural & social sciences  Ecological, evolutionary & environmental sciences

For a reference copy of the document with all sections, see [nature.com/documents/nr-reporting-summary-flat.pdf](https://www.nature.com/documents/nr-reporting-summary-flat.pdf)

## Life sciences study design

All studies must disclose on these points even when the disclosure is negative.

|                 |                                                                                                                                                                                                                                                                                                                                                                                            |
|-----------------|--------------------------------------------------------------------------------------------------------------------------------------------------------------------------------------------------------------------------------------------------------------------------------------------------------------------------------------------------------------------------------------------|
| Sample size     | No sample-size calculations were performed. Different sample sizes were used depending from the variability and consistency of data between groups and assay sensitivity. Sample sizes for the experiments were chosen based on literature analysis and on investigators' experience with the models.                                                                                      |
| Data exclusions | No data were excluded from the analysis.                                                                                                                                                                                                                                                                                                                                                   |
| Replication     | All findings reported were reproducible and data shown are replicates pooled from $\geq 2$ independent experiments, with comparable results in each experiment. The number of replicates are described in each figure legend.                                                                                                                                                              |
| Randomization   | Mice were randomly assigned in the different groups. For in vitro experiments, 6–12-week-old mice were matched by age and sex. All transgenic mice used were on a C57BL/6 background and were age-matched with wild-type controls for experiments. For other experiments that did not involve participant groups or animals, no samples randomization were performed as it was not needed. |
| Blinding        | No blinding was performed for the initial testing experiments. The blinding approach was used in experimental repeats whenever possible.                                                                                                                                                                                                                                                   |

## Reporting for specific materials, systems and methods

We require information from authors about some types of materials, experimental systems and methods used in many studies. Here, indicate whether each material, system or method listed is relevant to your study. If you are not sure if a list item applies to your research, read the appropriate section before selecting a response.

### Materials & experimental systems

| n/a                                 | Involved in the study                                           |
|-------------------------------------|-----------------------------------------------------------------|
| <input type="checkbox"/>            | <input checked="" type="checkbox"/> Antibodies                  |
| <input type="checkbox"/>            | <input checked="" type="checkbox"/> Eukaryotic cell lines       |
| <input checked="" type="checkbox"/> | <input type="checkbox"/> Palaeontology and archaeology          |
| <input type="checkbox"/>            | <input checked="" type="checkbox"/> Animals and other organisms |
| <input type="checkbox"/>            | <input checked="" type="checkbox"/> Human research participants |
| <input checked="" type="checkbox"/> | <input type="checkbox"/> Clinical data                          |
| <input checked="" type="checkbox"/> | <input type="checkbox"/> Dual use research of concern           |

### Methods

| n/a                                 | Involved in the study                              |
|-------------------------------------|----------------------------------------------------|
| <input checked="" type="checkbox"/> | <input type="checkbox"/> ChIP-seq                  |
| <input type="checkbox"/>            | <input checked="" type="checkbox"/> Flow cytometry |
| <input checked="" type="checkbox"/> | <input type="checkbox"/> MRI-based neuroimaging    |

## Antibodies

### Antibodies used

Rat anti-mouse CD3 molecular complex (clone 17A2) BD Biosciences Cat#741982  
 Hamster anti-mouse CD3 $\epsilon$  (clone 145-2C11), purified BioLegend Cat#100302  
 Rat anti-mouse CD4 (clone GK1.5) BD Biosciences Cat#562891; RRID:AB\_2737870  
 Rat anti-mouse CD8a (clone 53-6.7) BD Biosciences Cat#563068; RRID:AB\_2687548  
 InVivoMab anti-mouse CD8a (clone YTS 169.4) BioXCell Cat#BE0117; RRID:AB\_10950145  
 Rat anti-CD11b (clone M1/70) BD Biosciences Cat#741934  
 Hamster anti-mouse CD28 (clone 37.51), purified BioLegend Cat#102102  
 Rat anti-mouse CD45 (clone 30-F11) BD Biosciences Cat#564279; RRID:AB\_2651134  
 Rat anti-mouse CD45R/B220 (clone RA3-6B2) BD Biosciences Cat#563892  
 Hamster anti-mouse CD69 (clone H1.2F3) BD Biosciences Cat#552879  
 Rat anti-mouse CD335( $\alpha$ NK-p46) (clone 29A1.4) BD Biosciences Cat#562850  
 Rat anti-mouse F4/80 (clone BM8) BioLegend Cat#123114  
 Rabbit anti-GFP mAb (clone D5.1) (detects GFP, YFP, CFP) Cell Signaling Technology Cat#2956  
 CD137L (4-1BBL) Antibody, anti-mouse, REAfinity (Clone: REA962) Miltenyi Biotec Cat#: 130-116-011  
 CD252 (OX40L) Antibody, anti-mouse, APC, REAfinity (Clone: REA960) Miltenyi Biotec Cat#: 130-116-073  
 Mouse anti-human/mouse Granzyme B (clone QA16A02) BioLegend Cat#372204  
 Rat anti-mouse Ly6C (clone HK1.4) BioLegend Cat#128006  
 Rat anti-mouse Ly6G (clone 1A8) BD Biosciences Cat#562737; RRID:AB\_2737756

## Validation

InVivoMab anti-mouse Ly6G (clone 1A8) BioXCell Cat#BE0075-1; RRID:AB\_1107721  
 Rabbit anti-Neutrophil Elastase antibody Abcam Cat#ab68672  
 InVivoMab anti-mouse PD1 (clone RMP1-14) BioXCell Cat# BE0146; RRID:AB\_10949053  
 secondary antibodies Dako EnVision+ System- HRP Labelled Polymer Anti-Rabbit ; Agilent Code K4002  
 InVivoMab anti-mouse OX40L (CD134L) (clone RM134L) Cat# BE0033  
 InVivoMab anti-mouse 4-1BBL (CD137L) (clone TKS-1) Cat# BE0110

Rat anti-mouse CD3 molecular complex (clone 17A2) BD Biosciences Cat#741982  
 Reactivity: Mouse (Tested in Development) / Application: Flow cytometry (Qualified)  
 Hamster anti-mouse CD3ε (clone 145-2C11), purified BioLegend Cat#100302  
 Reactivity: Mouse (Tested in Development) / Application: FC - Quality tested ; IHC-F – Validated ; IP, Activ, Block, WB, ICC - Reported in the literature  
 Rat anti-mouse CD4 (clone GK1.5) BD Biosciences Cat#562891; RRID:AB\_2737870  
 Reactivity: Mouse (Tested in Development) / Application: Flow cytometry (Qualified)  
 Rat anti-mouse CD8a (clone 53-6.7) BD Biosciences Cat#563068; RRID:AB\_2687548  
 Reactivity: Mouse (Tested in Development) / Application: Flow cytometry (Qualified)  
 InVivoMab anti-mouse CD8a (clone YTS 169.4) BioXCell Cat#BE0117; RRID:AB\_10950145  
 Reactivity: Mouse / Reported Applications: in vivo CD8+ T cell depletion, Western blot  
 Rat anti-CD11b (clone M1/70) BD Biosciences Cat#741934  
 Reactivity: Mouse (Tested in Development) / Application: Flow cytometry (Qualified)  
 Hamster anti-mouse CD28 (clone 37.51), purified BioLegend Cat#102102  
 Reactivity: Mouse / Application: FC - Quality tested; IP, IHC-F, Costim, Block - Reported in the literature  
 Rat anti-mouse CD45 (clone 30-F11) BD Biosciences Cat#564279; RRID:AB\_2651134  
 Reactivity: Mouse (Tested in Development) / Application: Flow cytometry (Qualified)  
 Rat anti-mouse CD45R/B220 (clone RA3-6B2) BD Biosciences Cat#563892  
 Reactivity: Mouse (Tested in Development) / Application: Flow cytometry (Qualified)  
 Hamster anti-mouse CD69 (clone H1.2F3) BD Biosciences Cat#552879  
 Reactivity: Mouse (Tested in Development) / Application: Flow cytometry (Qualified)  
 Rat anti-mouse CD335 (clone 29A1.4) (αNK-p46) BD Biosciences Cat#562850  
 Reactivity: Mouse (Tested in Development) / Application: Flow cytometry (Qualified)  
 Rat anti-mouse F4/80 (clone BM8) BioLegend Cat#123114  
 Reactivity: Mouse (Tested in Development) / Application: Flow cytometry (Qualified)  
 Rabbit anti-GFP mAb (clone D5.1) (detects GFP, YFP, CFP) Cell Signaling Technology Cat#2956  
 REACTIVITY: All / Application: Dilution Western Blotting 1:1000 / Immunohistochemistry (Paraffin) 1:200  
 Mouse anti-human/mouse Granzyme B (clone QA16A02) BioLegend Cat#372204  
 Reactivity: Human, Mouse / Application ICFC - Quality tested  
 Rat anti-mouse Ly6C (clone HK1.4) BioLegend Cat#128006  
 Reactivity: Mouse / Application: FC (Quality tested)  
 Rat anti-mouse Ly6G (clone 1A8) BD Biosciences Cat#562737; RRID:AB\_2737756  
 Reactivity: Mouse (Tested in Development) / Application: Flow cytometry (Qualified)  
 CD137L (4-1BBL) Antibody, anti-mouse, REAfinity (Clone: REA962) Miltenyi Biotec Cat#: 130-116-011  
 Reactivity: Mouse / Application FC (QC tested)  
 CD252 (OX40L) Antibody, anti-mouse, APC, REAfinity (Clone: REA960) Miltenyi Biotec Cat#: 130-116-073  
 Reactivity: Mouse / Application FC (QC tested)  
 InVivoMab anti-mouse Ly6G (clone 1A8) BioXCell Cat#BE0075-1; RRID:AB\_1107721  
 Reactivity: Mouse / Reported Applications: in vivo neutrophil depletion, in vivo MDSC depletion, Immunofluorescence, Immunohistochemistry (paraffin), Immunohistochemistry (frozen), Flow cytometry  
 Rabbit anti-Neutrophil Elastase antibody Abcam Cat#ab68672  
 Species reactivity Reacts with: Mouse, Human / Tested applications Suitable for: ICC/IF, WB, IHC-Fr, IHC-P  
 InVivoMab anti-mouse PD1 (clone RMP1-14) BioXCell Cat# BE0146; RRID:AB\_10949053  
 Reactivity: Mouse / Reported Applications: in vivo blocking of PD-1/PD-L signaling  
 InVivoMab anti-mouse OX40L (CD134L) (clone RM134L) Cat# BE0033  
 Reactivity: Mouse / Reported Applications: in vivo blocking of OX-40L signaling  
 InVivoMab anti-mouse 4-1BBL (CD137L) (clone TKS-1) Cat# BE0110  
 Reactivity: Mouse / Reported Applications: in vivo blocking of 4-1BBL signaling

## Eukaryotic cell lines

Policy information about [cell lines](#)

## Cell line source(s)

Mouse: B16-F10 // ATCC Cat#CRL-6475; RRID: CVCL\_0159  
 Mouse: LL/2 (LLC1) // ATCC Cat#CRL-21642; RRID: CVCL\_4358  
 Mouse: C57BL/6N-Atm1Brd Ppm1d1tm1a(KOMP)Wtsi ES cells Knockout Mouse Project Repository CSD 44399; KOMP: CSD44399-1a-Wtsi  
 Human: DLD-1 colorectal adenocarcinoma cell line // ATCC CCL-221; RRID:CVCL\_0248  
 Human: HCT 116 Colorectal carcinoma cell line // ATCC CCL-247; RRID:CVCL\_0291  
 Human: HCT 116 Colorectal carcinoma, p53-null // Bert Vogelstein RRID:CVCL\_HD97

## Authentication

All experimental cell lines were obtained from ATCC with the proper certificates of authentication and used at early passages

from unfreezing original vial. The ATCC used SRT and isoenzymes profiles for cell authentication. further authentication was not required.

Mycoplasma contamination

All cell lines were tested negative for mycoplasma contamination

Commonly misidentified lines  
(See [ICLAC](#) register)

No commonly misidentified cell lines were used in this study.

## Animals and other organisms

Policy information about [studies involving animals](#); [ARRIVE guidelines](#) recommended for reporting animal research

Laboratory animals

Mouse: C57BL/6J The Jackson Laboratory Cat#000664; RRID: IMSR\_JAX:000664  
 Mouse: R26R-EYFP: B6.129X1-Gt(ROSA)26Sortm1(EYFP)Cos/J The Jackson Laboratory JAX:006148; RRID: IMSR\_JAX:006148  
 Mouse: LysM-cre: B6.129P2-Lyz2tm1(cre)lfo/J The Jackson Laboratory JAX:004781; RRID: IMSR\_JAX:004781  
 Mouse: MRP8-creTg: B6.Cg-Tg(S100A8-cre,-EGFP)1llw/J The Jackson Laboratory JAX:021614; RRID: IMSR\_JAX:021614  
 Mouse:  $\beta$ -actin-creTg: C57BL/6J-Tg( $\beta$ -actin-cre) Lewandowski et al. 1997 MGI:46833  
 Mouse:  $\beta$ -actin-flpTg: C57BL/6J-Tg( $\beta$ -actin-flp) Dymecki et al. 1996 MGI:2158498  
 Mouse: FES-creTg: C57BL6-Tg(FES-cre)31Bsl Keller et al. 2001 MGI:2450256  
 Mouse: Trp53KO:B6.129-Trp53tm1Brd/N Donehower et al. 1992 MGI:1857590  
 Mouse: UBC-Ppm1dTg: C57BL6-Tg(UBC-Ppm1d) Wong et al. 2009 N/A  
 Mouse: Ppm1dKO2:C57BL6-Ppm1dTm1b(KOMP)Wtsi This manuscript N/A  
 Mouse: Ppm1dfi: C57BL6-Ppm1dTm1c(KOMP)Wtsi This manuscript N/A  
 Mouse: Ppm1dKO3: C57BL6-Ppm1dTm1d(KOMP)Wtsi This manuscript N/A  
 All animals were bred and maintained in specific pathogen-free facilities with 12 light/12 dark cycle, temperature ~20-23°C, 45-60% humidity. Animals had water ad libitum and were fed regular chow. Experiments were performed on 8 to 12-week-old female and males of the immunocompetent C57Bl/6 background. 2 to 12-months-old female and males were used in experiments for Figure 1a. Littermate animals from different cages were randomly assigned into experimental groups and were either co-housed or systematically exposed to other groups' bedding to ensure equal exposure to common microbiota.

Wild animals

No wild animals were used in the study.

Field-collected samples

No field-collected samples were used.

Ethics oversight

All experiments were carried out in accordance with FELASA and Animal Experimental Ethics Committee guidelines (University of Burgundy, France) or with NCI Animal Care and Use Committee guidelines (NCI).

Note that full information on the approval of the study protocol must also be provided in the manuscript.

## Human research participants

Policy information about [studies involving human research participants](#)

Population characteristics

The population characteristics were provided in Supplementary table 1 for human tumor samples (4- females , 1- male; age range 53-81). Human neutrophils and T cells were isolated from the blood of adult healthy donors randomly supplied from Etablissement Français du Sang Bourgogne Franche-Comté, Besançon, France.

Recruitment

Five patients with stage I-II lung cancer, who were scheduled for surgical resection, consented to tissue collection of a portion of their tumor and/or blood for research purposes Institutional Review Board of the Hospital of the University of Pennsylvania. There has been no potential self-selection bias because lung cancer patients and blood donors were selected randomly. Buffy coats from random donors were purchased from The French Blood Bank (EFS) – Bourgogne Franche-Comté.

Ethics oversight

This study was approved by the Institutional Review Board of the Hospital of the University of Pennsylvania. For donors's blood, ethical review and approval were done by the French Blood Transfusion Center (Etablissement Français du Sang Bourgogne Franche-Comté, Besançon, France).

Note that full information on the approval of the study protocol must also be provided in the manuscript.

## Flow Cytometry

### Plots

Confirm that:

- The axis labels state the marker and fluorochrome used (e.g. CD4-FITC).
- The axis scales are clearly visible. Include numbers along axes only for bottom left plot of group (a 'group' is an analysis of identical markers).
- All plots are contour plots with outliers or pseudocolor plots.
- A numerical value for number of cells or percentage (with statistics) is provided.

## Methodology

|                           |                                                                                                                                                                                                                                                                                                                                                                                                                                                                                                                                                                                                                                                                                                                                                                                                                                                                                                                                                                                                                                                                                                                                          |
|---------------------------|------------------------------------------------------------------------------------------------------------------------------------------------------------------------------------------------------------------------------------------------------------------------------------------------------------------------------------------------------------------------------------------------------------------------------------------------------------------------------------------------------------------------------------------------------------------------------------------------------------------------------------------------------------------------------------------------------------------------------------------------------------------------------------------------------------------------------------------------------------------------------------------------------------------------------------------------------------------------------------------------------------------------------------------------------------------------------------------------------------------------------------------|
| Sample preparation        | Single-cell suspensions were re-suspended in BD stain buffer (BD Bioscience) for 15 min prior to staining with specific antibodies. Antibodies against cell surface markers: anti-CD45, anti-CD3, anti-CD4, anti-CD8a, anti-CD11b, anti-F4/80, anti-Ly6G, anti-Ly6C, anti-NKp46, anti-B220, anti-CD69, were purchased from BD Bioscience and BioLegend (detailed in Key Resources Table). Samples were mixed with FVS700 (1/7000) and data were acquired on an LSR Fortessa flow cytometer (BD Biosciences) and analyzed with FlowJo software (Tree Star). ROS generation in cultured neutrophils was determined using a dihydroethidium (DHE) fluorescent probe. Cells were incubated with DHE (10 $\mu$ M) in HBSS containing 1.5 mM CaCl <sub>2</sub> and 1mM MgCl <sub>2</sub> for 30 min at 37°C and analyzed by flow cytometry. LacZ activity was determined by flow cytometry using Fluorescein di[ $\beta$ -D-galactopyranoside] (Sigma, F2756) as described elsewhere (see ref 91)                                                                                                                                              |
| Instrument                | Flow cytometry data was collected on a BD LSR FORTESSA. Flow cytometry sorting was performed on a BD FACSAria-III (BD Biosciences).                                                                                                                                                                                                                                                                                                                                                                                                                                                                                                                                                                                                                                                                                                                                                                                                                                                                                                                                                                                                      |
| Software                  | Flow cytometry data were analyzed on FlowJo Tree Star (V10.0.2)                                                                                                                                                                                                                                                                                                                                                                                                                                                                                                                                                                                                                                                                                                                                                                                                                                                                                                                                                                                                                                                                          |
| Cell population abundance | Human CD3+ T cells were obtained from buffy coat preparations of human healthy donor blood. T cells were purified using a Pan T Cell Isolation Kit and re-stimulated with a human T Cell Activation/Expansion Kit (Miltenyi Biotec).<br>Mouse Naive CD3+ T cells were obtained from spleens and lymph nodes of C57BL/6 wild-type mice. Cells were purified using the MACS Cell Separation system (Pan T Cell isolation kit, Miltenyi Biotec).<br>Mouse neutrophils were obtained using a mouse Neutrophil Isolation Kit (Miltenyi Biotec).<br>TANs were isolated from tumor single cell suspensions using positive selection of CD66b+ cells with microbeads as previously described (Eruslanov JCI 2014, Singhal Cancer Cell 2016).<br>PBNs were obtained from EDTA anti-coagulated peripheral blood collected from lung cancer patients during surgery or from healthy donors. The PBNs were obtained from Lymphoprep (Accu-Prep, 1.077 g/ml, Oslo, Norway) density gradient centrifugation followed by erythrocyte lysis with 1x RBC Lysis Buffer.<br>Purity of isolated cells was confirmed by cytometry and cells were pure at >90% |
| Gating strategy           | Tumor infiltrating cells were selected using FSC/SSC gating, CD45+ live cells were selected (based on viability staining), and different cell population were analysed in Live CD45+ cells, using FMO samples as control. Gating strategies are presented in Extended data Fig. S3.                                                                                                                                                                                                                                                                                                                                                                                                                                                                                                                                                                                                                                                                                                                                                                                                                                                      |

Tick this box to confirm that a figure exemplifying the gating strategy is provided in the Supplementary Information.
